# Supplementary material for: Outcomes of thin versus thick-wire snares for cold snare polypectomy: a systematic review and meta-analysis
Source: PubMed Central journal article supplement — Clin Endosc. 2022 Nov 9;55(6):742–50. doi: 10.5946/ce.2022.141 (PMC9726435; doi:10.5946/ce.2022.141), 2022-11-09
Supplement: ce-2022-141-suppl1.pdf [file ce-2022-141-suppl1.pdf]

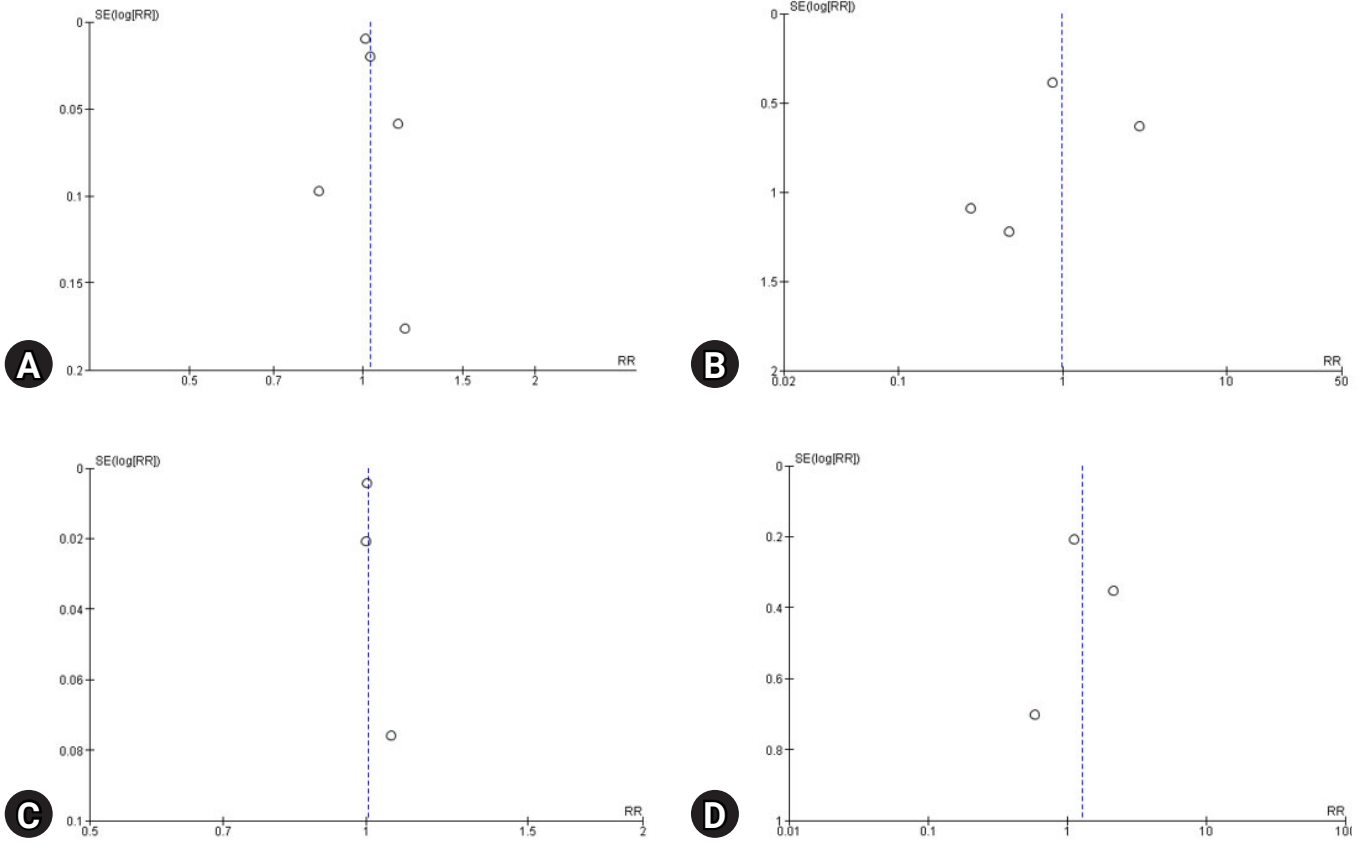

**Supplementary Fig. 1.** Funnel plot for assessment of publication bias. (A) Histological resection. (B) Overall bleeding. (C) Polyp retrieval. (D) Submucosal involvement. SE, standard error; RR, risk ratio.
